# Supplementary figures and images for: Multi-omics data integration reveals correlated regulatory features of triple negative breast cancer
Source: PubMed Central journal article supplement — Mol Omics. 2021 Jun 18;17(5):677–91. doi: 10.1039/d1mo00117e (PMC8504614; doi:10.1039/d1mo00117e), 2021-06-18

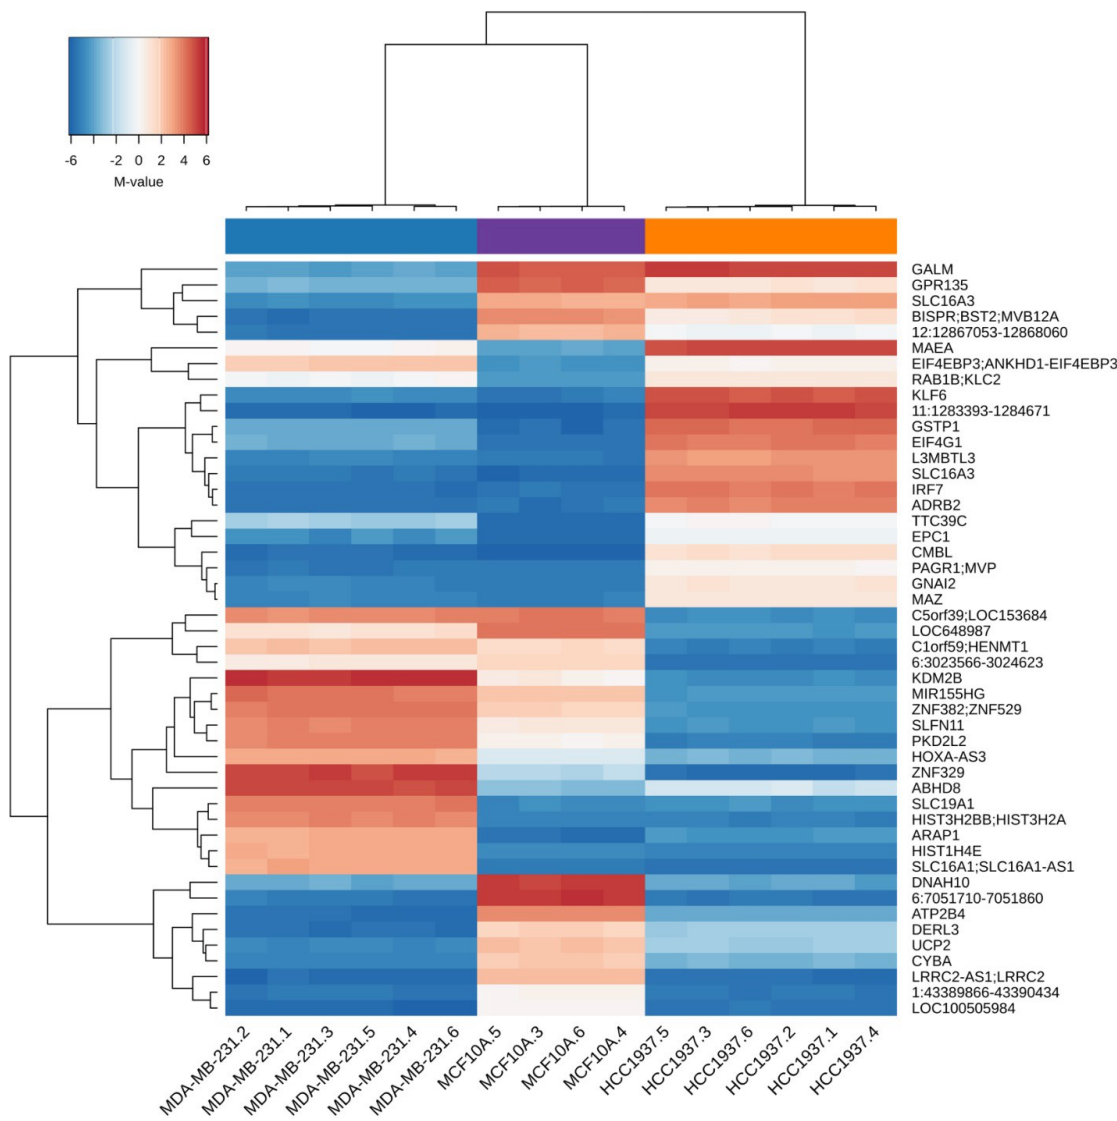

Supplement: MO-017-D1MO00117E-s002.pdf [file MO-017-D1MO00117E-s002.pdf]

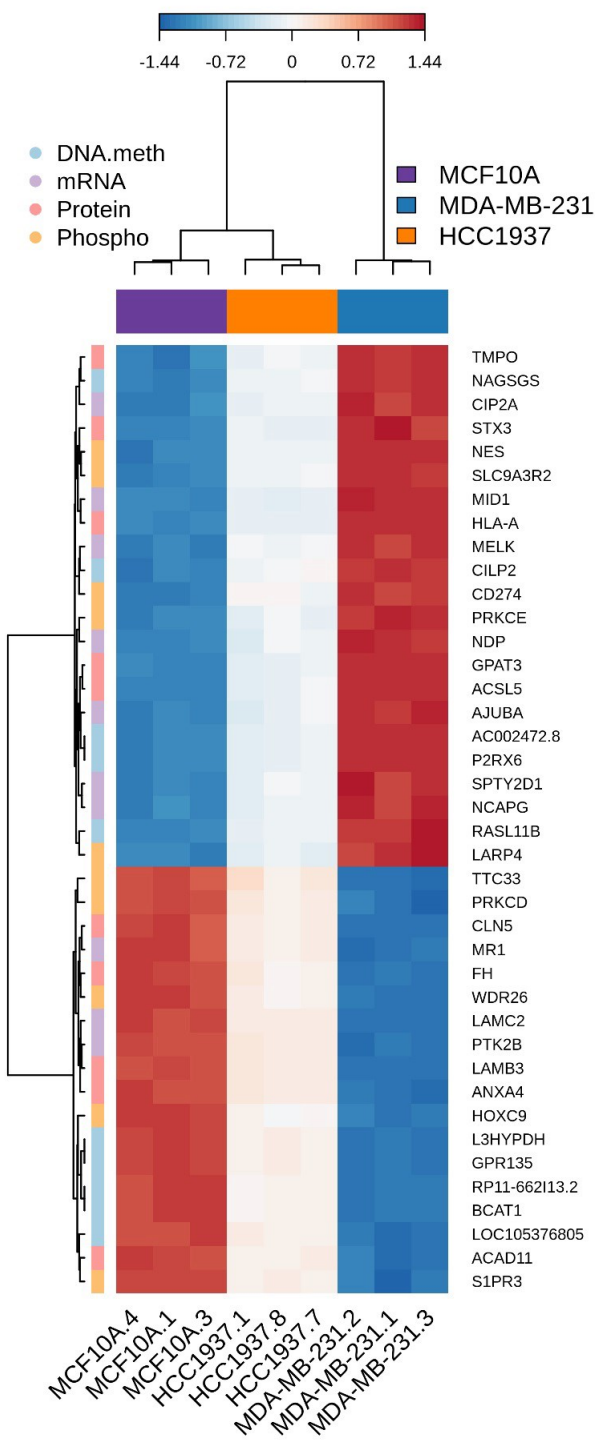

Supplement: MO-017-D1MO00117E-s003.pdf [file MO-017-D1MO00117E-s003.pdf]

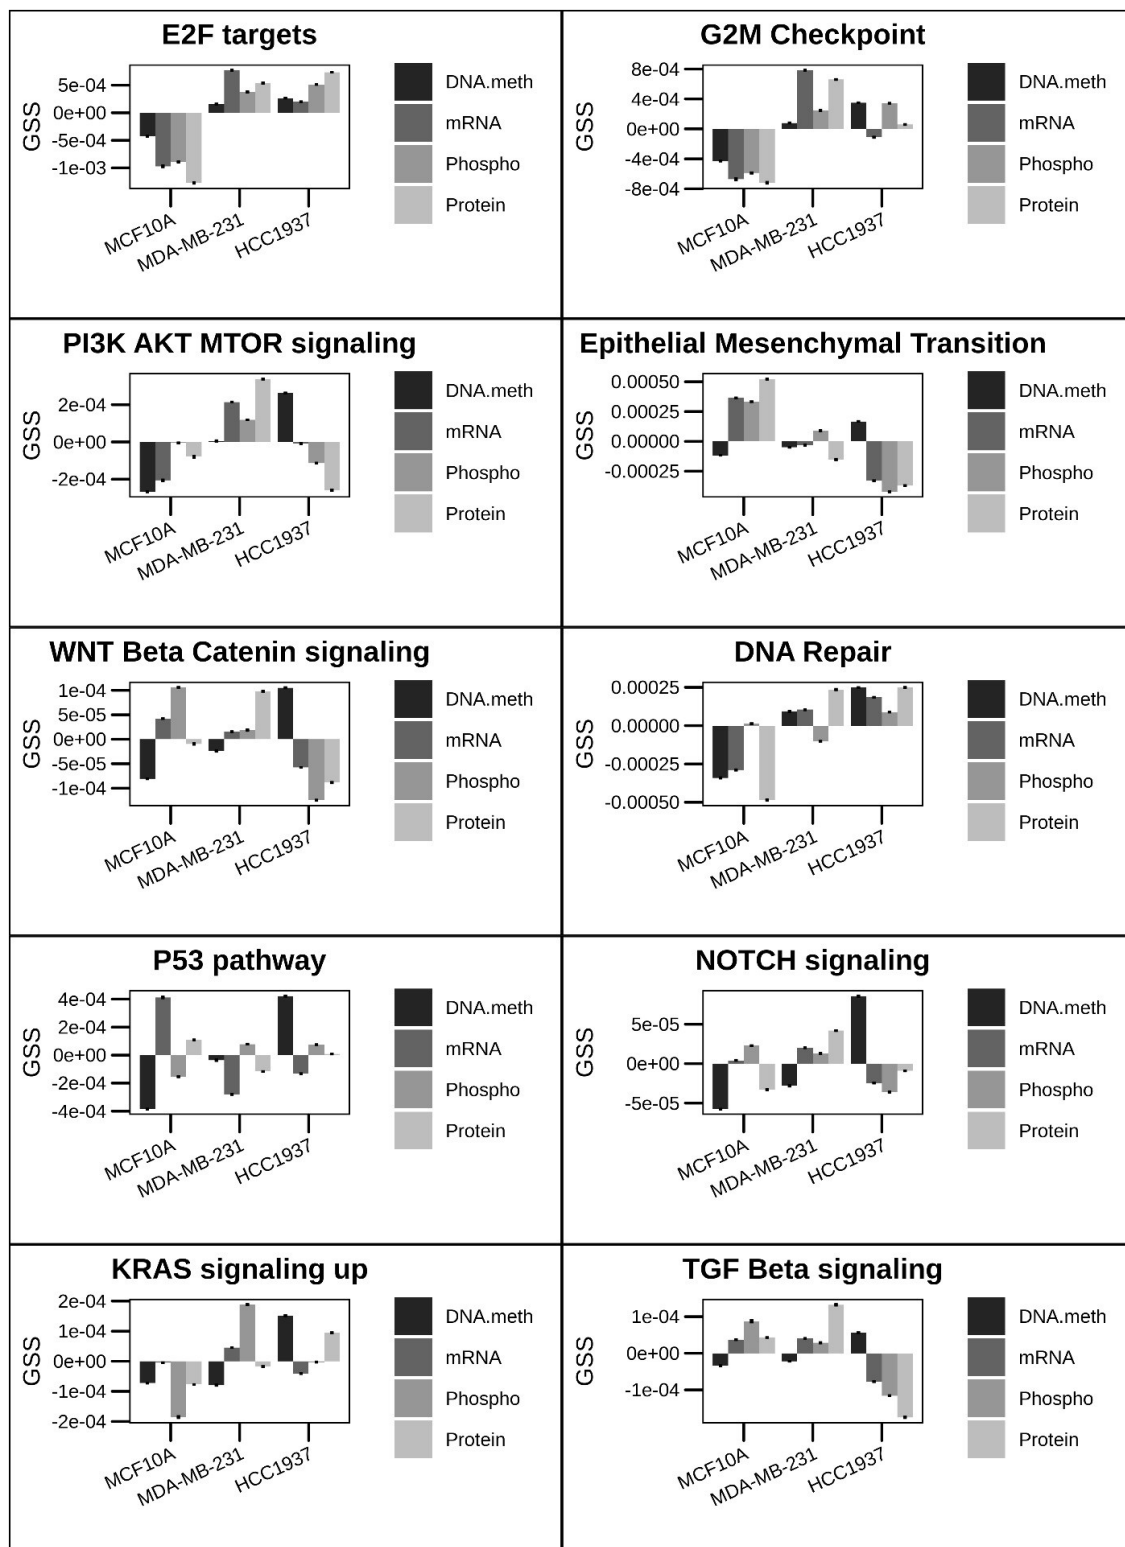

Supplement: MO-017-D1MO00117E-s004.pdf [file MO-017-D1MO00117E-s004.pdf]

RNAseq

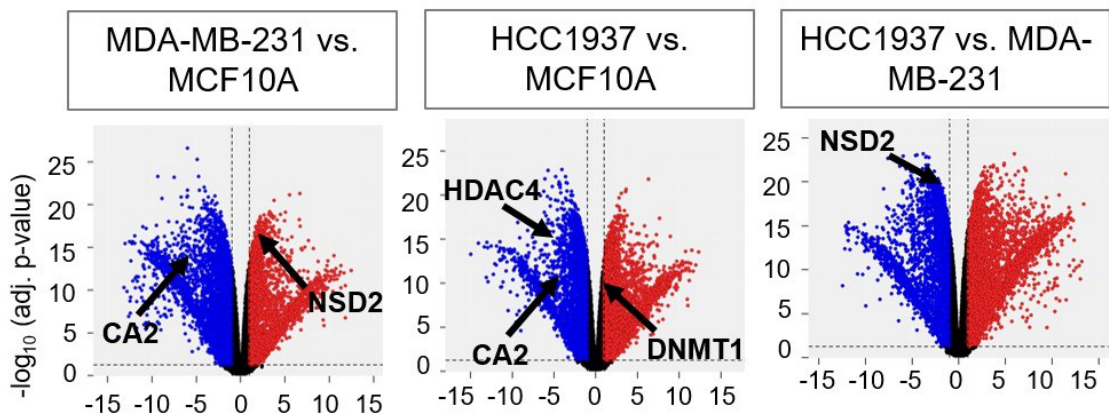

Protein

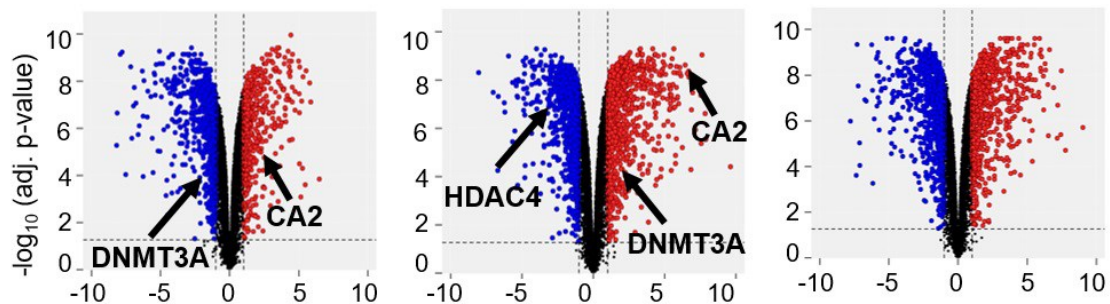

Phosphopeptides

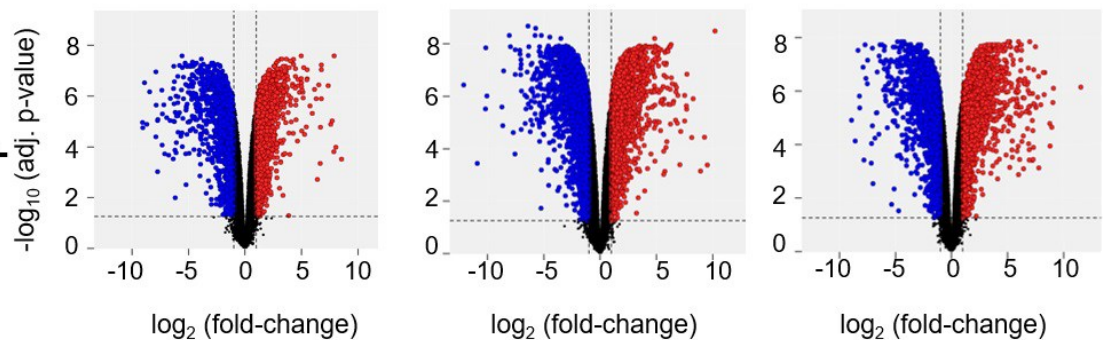

Supplement: MO-017-D1MO00117E-s005.pdf [file MO-017-D1MO00117E-s005.pdf]
